# Supplementary material
Source: publisher figshare collection journal article supplement (https://diabetesjournals.figshare.com/articles/dataset/_/25104206)

■ TAR (>13.9 mmol/L) **TARGET: <5%**
■ TAR (10.1–13.9 mmol/L) **TARGET: <25%\***
■ TIR (3.9–10.0 mmol/L) **TARGET: >70%**
■ TBR (3.0–3.8 mmol/L) **TARGET: <4%†**
■ TBR (<3.0 mmol/L) **TARGET: <1%**

## End of treatment

A

### ONWARDS 2 Basal switch

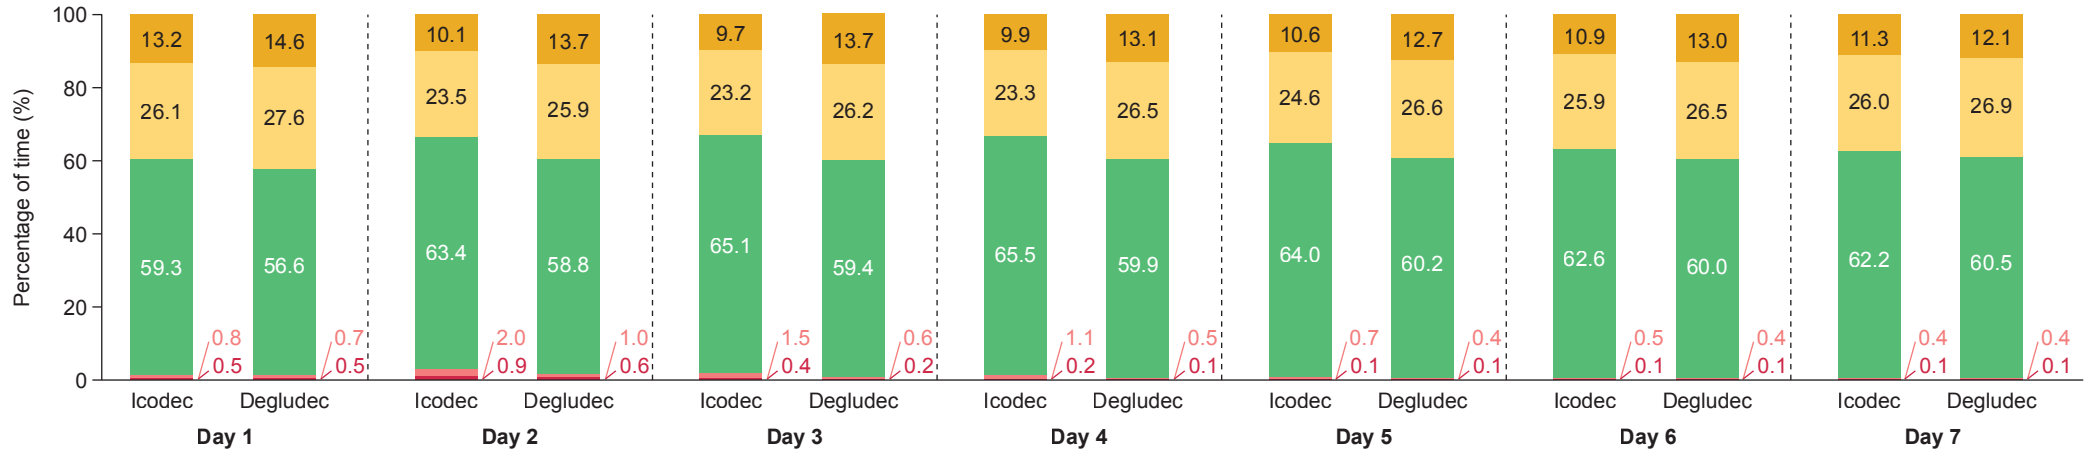

B

### ONWARDS 4 Basal-bolus switch

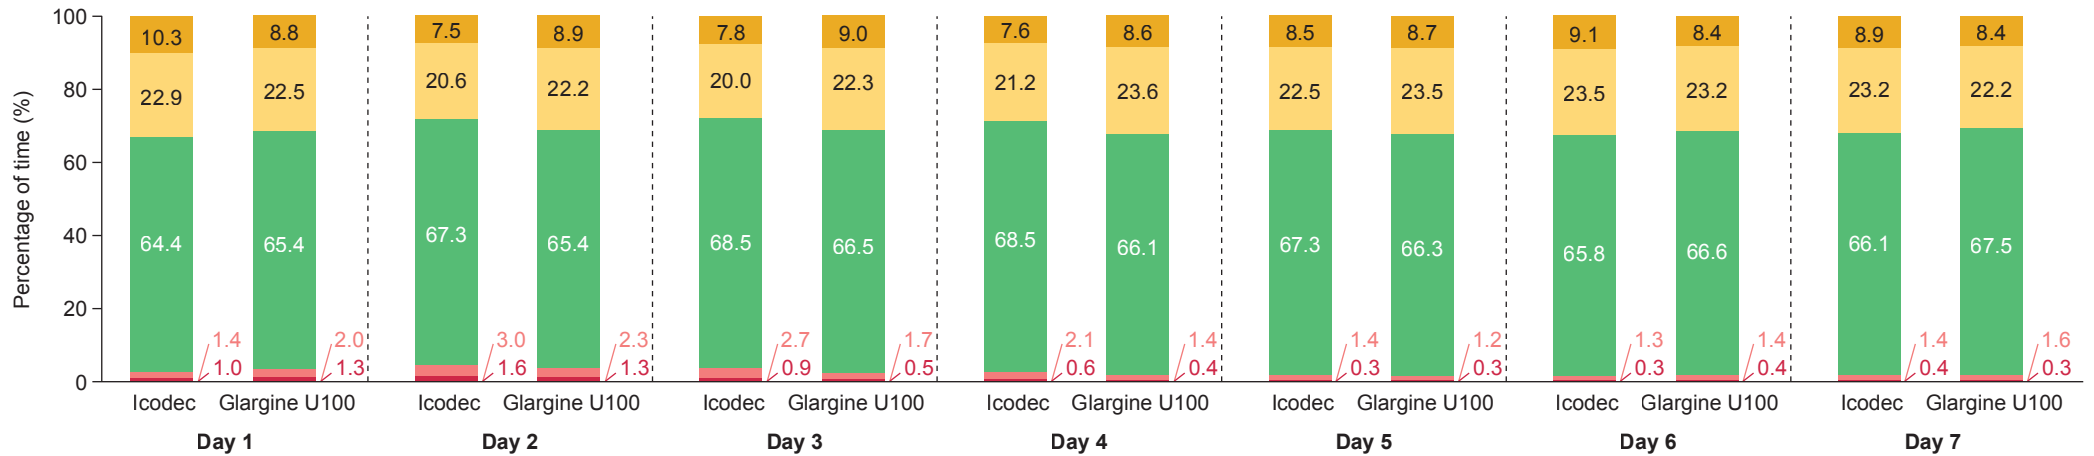

Supplement: Supplementary file 2 [file 1]
