# Supplementary material
Source: publisher figshare collection journal article supplement (https://diabetesjournals.figshare.com/articles/dataset/_/25104206)

**A****ONWARDS 2  
Basal switch**

&gt;70% TIR, &lt;25% TAR, and &lt;4% TBR (&lt;3.9 mmol/L)

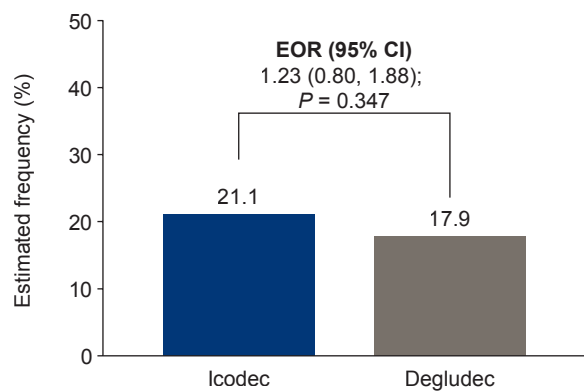**B****ONWARDS 4  
Basal-bolus switch**

&gt;70% TIR, &lt;25% TAR, and &lt;4% TBR (&lt;3.9 mmol/L)

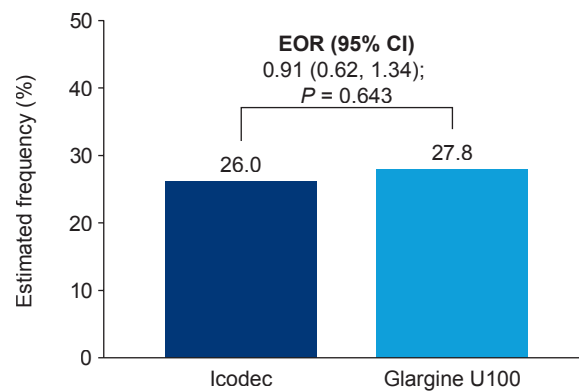

Supplement: Supplementary file 8 [file 1]
