# Supplementary material
Source: publisher figshare collection journal article supplement (https://diabetesjournals.figshare.com/articles/dataset/_/25104206)

**A****ONWARDS 2  
Basal switch**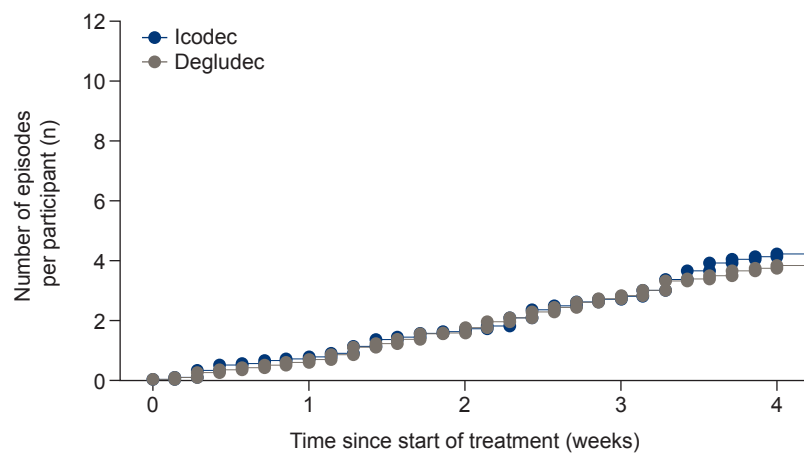**B****ONWARDS 4  
Basal-bolus switch**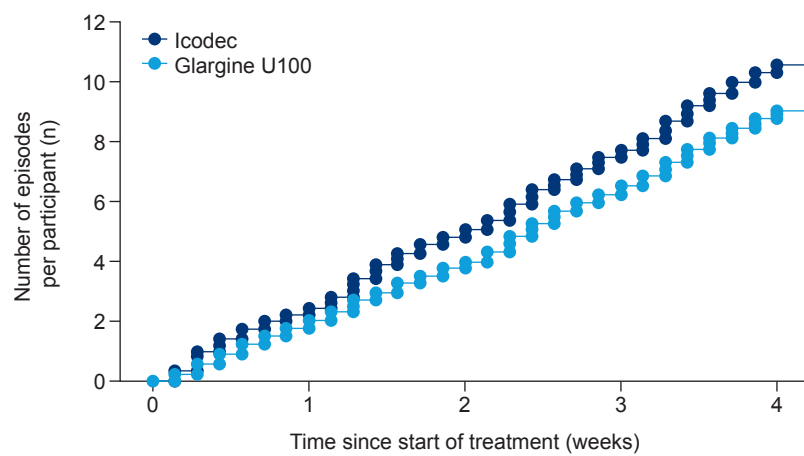

Supplement: Supplementary file 1 [file 1]

## Switch

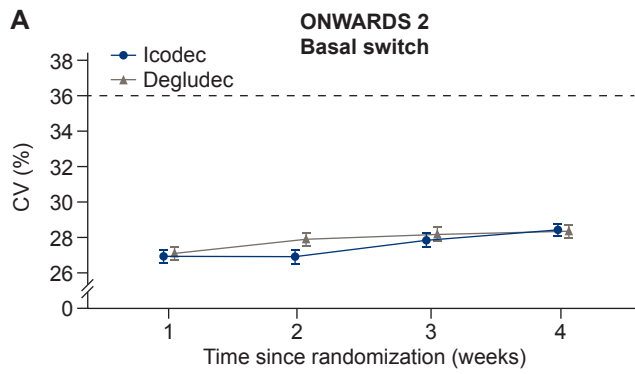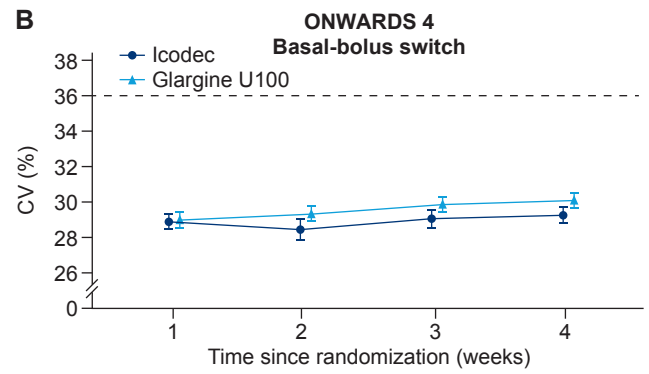

## End of treatment

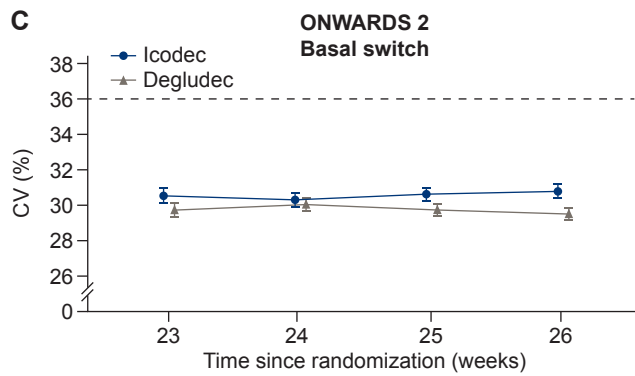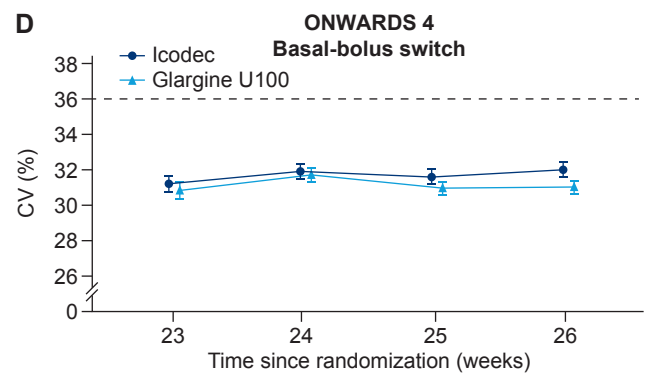

## Follow-up

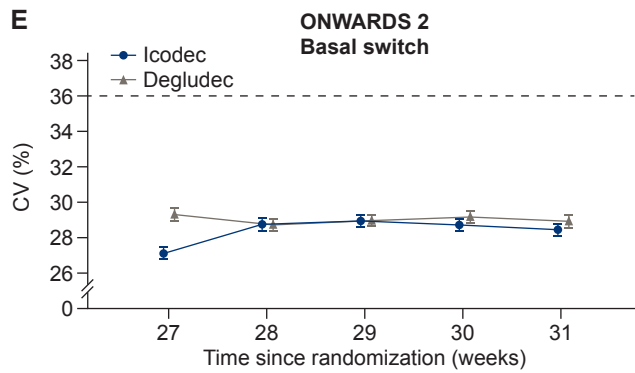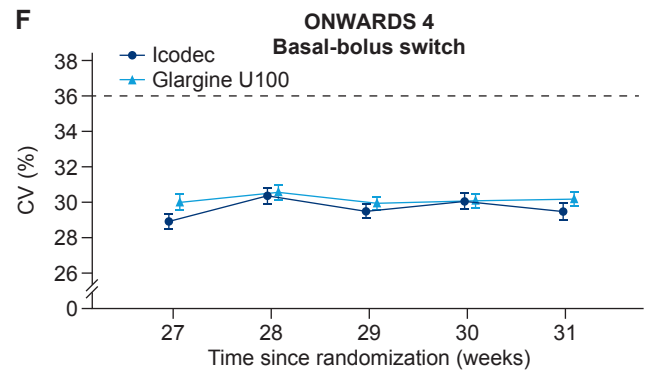

Supplement: Supplementary file 3 [file 1]

## Switch

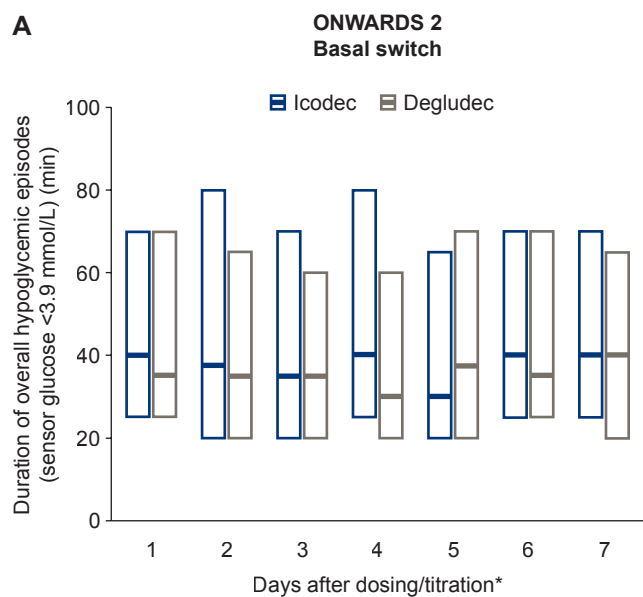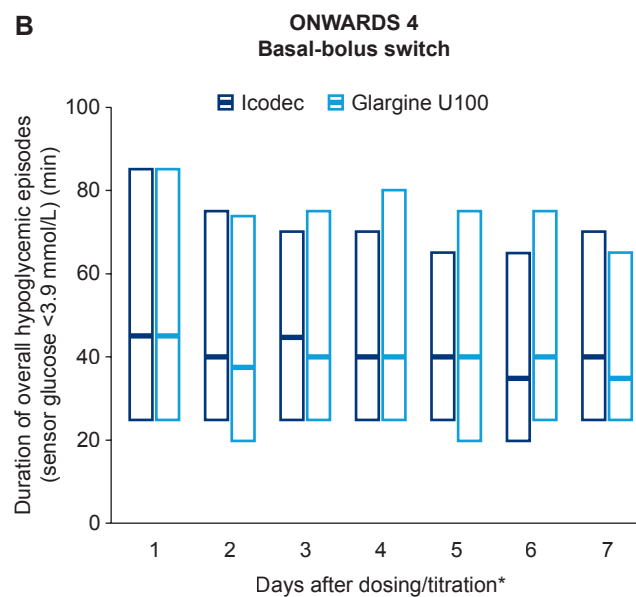

## End of treatment

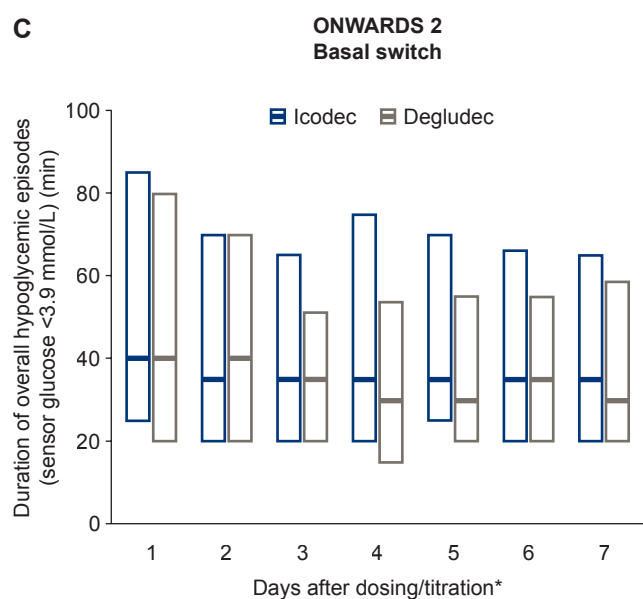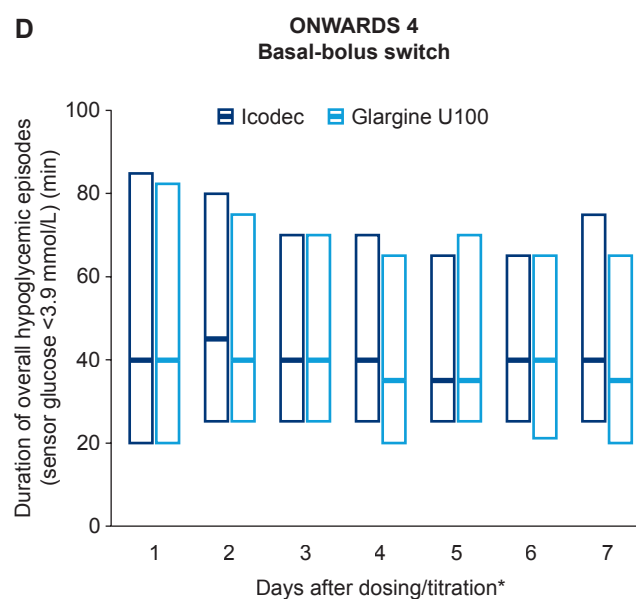

Supplement: Supplementary file 4 [file 1]

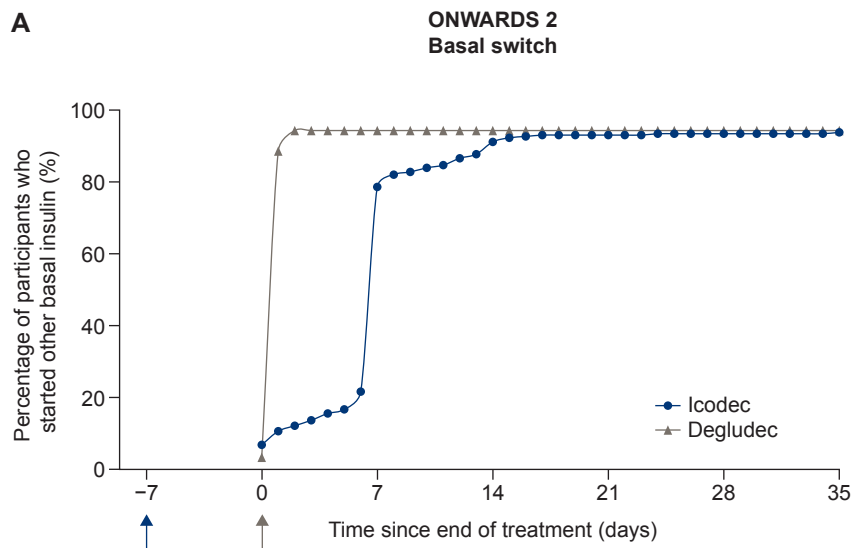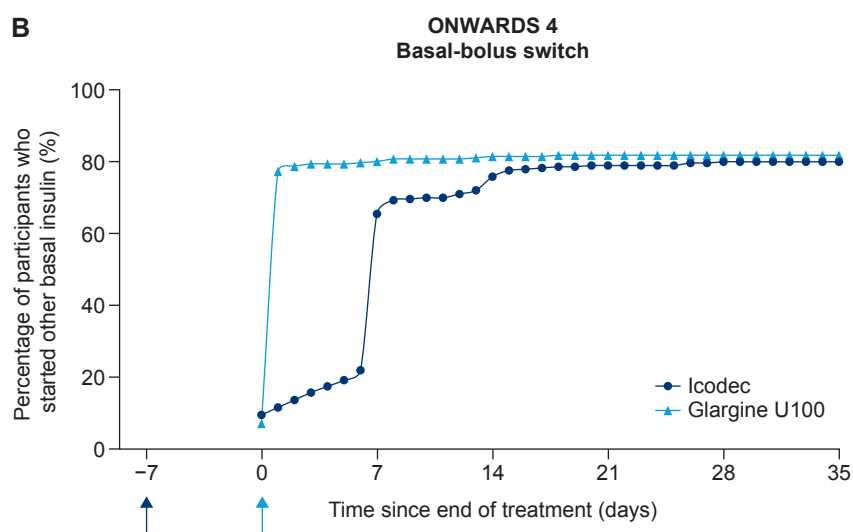

Supplement: Supplementary file 5 [file 1]

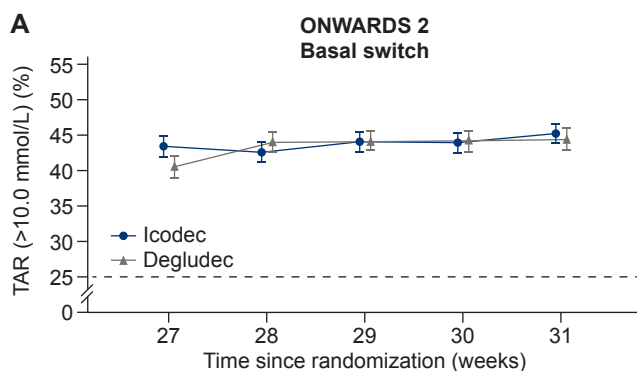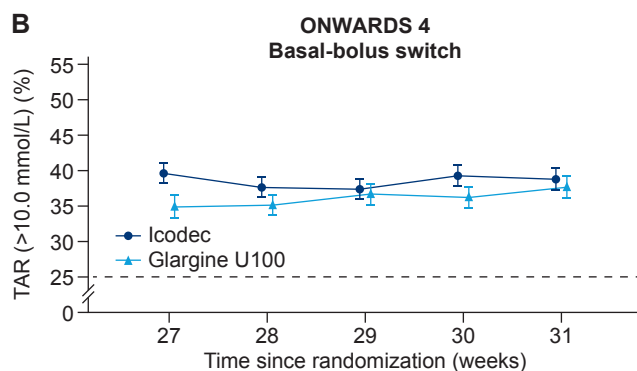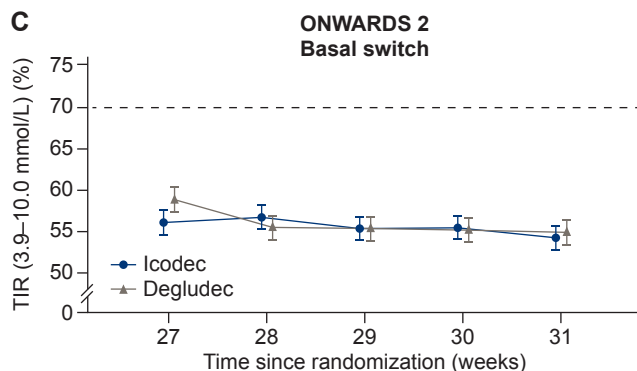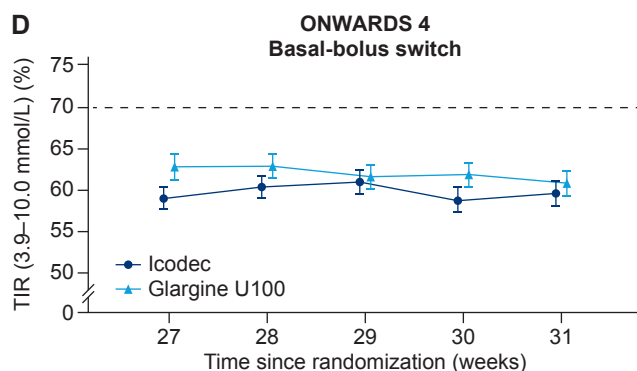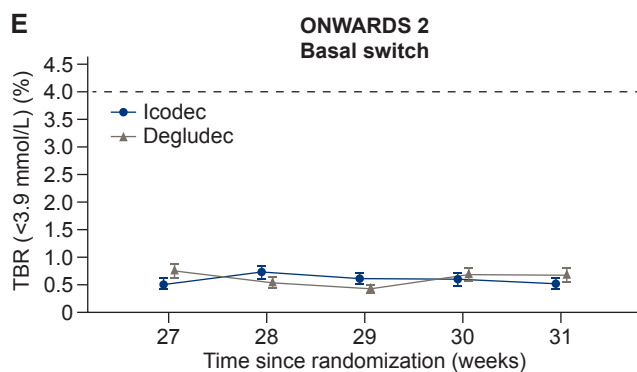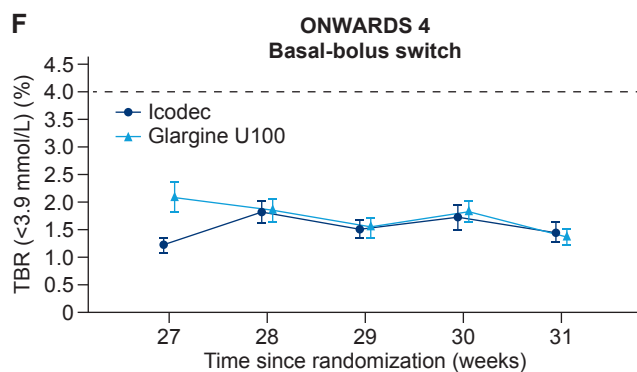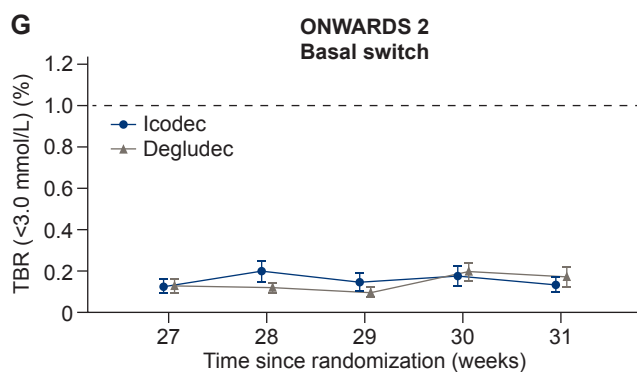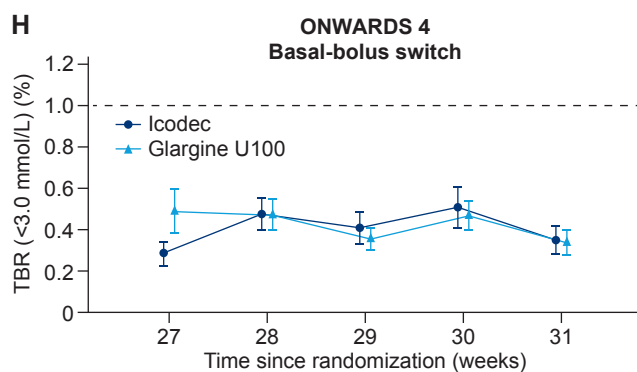

Supplement: Supplementary file 7 [file 1]

**A**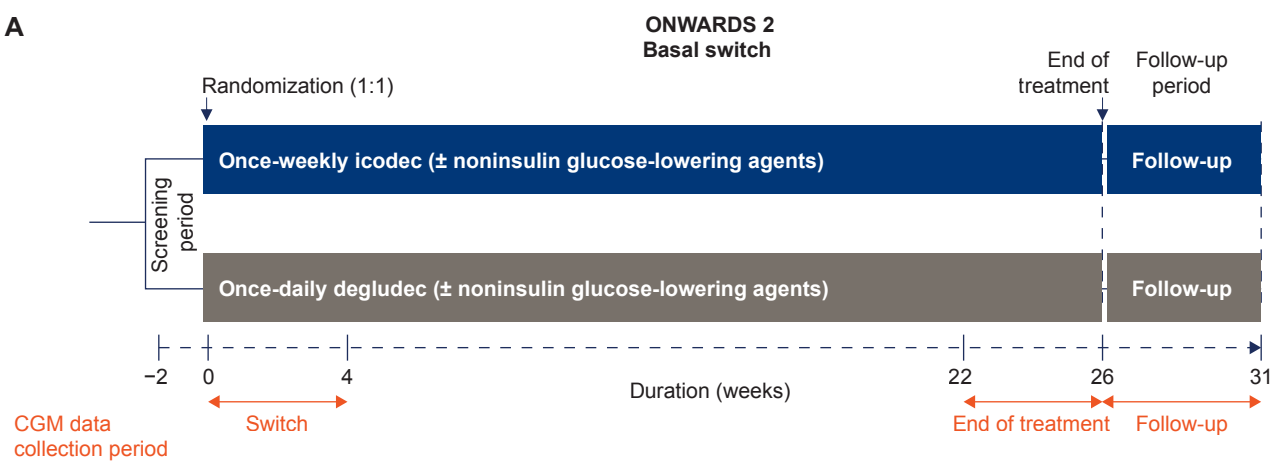**B**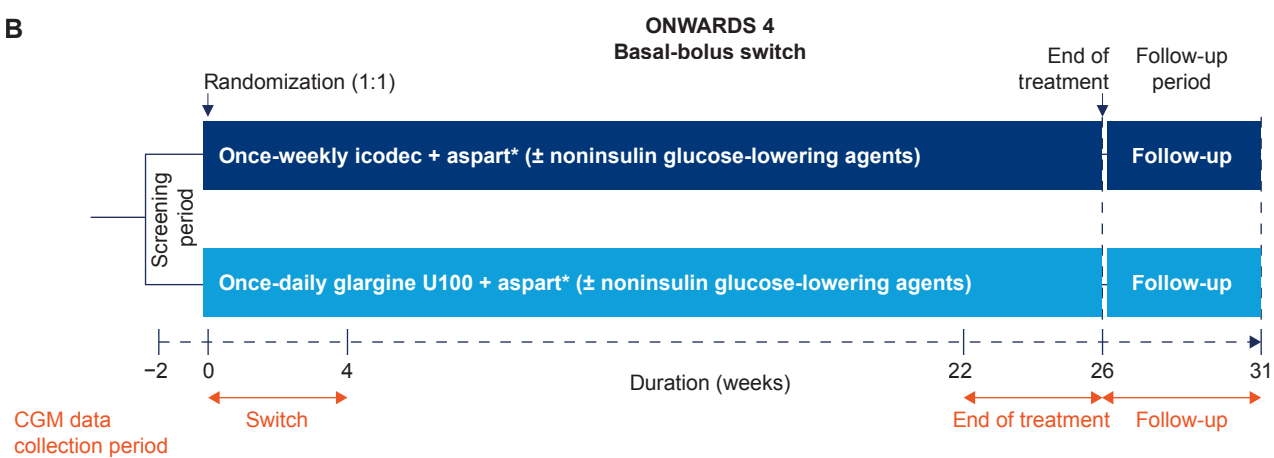

Supplement: Supplementary file 9 [file 1]
